# Supplementary material for: New Technique in Assessment of Heart Chambers Remodeling in Acquired Mitral Valve Defects
Source: MDPI journal article supplement (doi:10.3390/jcdd7020014), 2020-04-21
Supplement: s1 [file s1]

## New Technique in Assessment of Heart Chambers Remodeling in Acquired Mitral Valve Defects

Leo Bokeria, Vladimir Makarenko and Tatiana Kosareva \*

A.N. Bakulev National Medical Research Center of Cardiovascular Surgery, Moscow, 121552, Russia;  
info@bakulev.ru (L.B.); vnmakarenko@heart-house.ru (V.M.)

\* Correspondence: tikosareva@bakulev.ru; Tel.: +7-910-424-57-87

Received: 5 February 2020; Accepted: 14 April 2020; Published: date

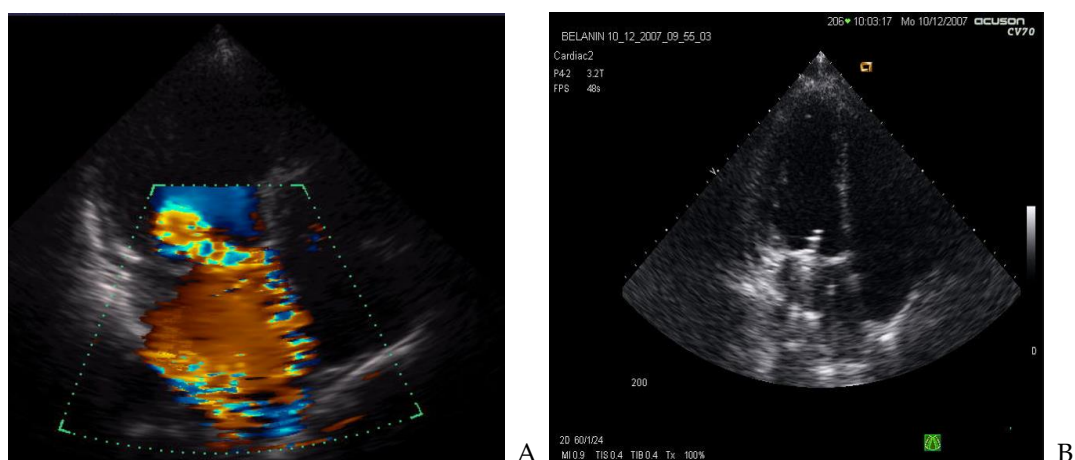

**Figure S1.** Type I remodeling (mild) - favorable prognosis (IRV 0.8-2.0). Patient with acute infectious endocarditis and 3d degree regurgitation: pre-operative IRV - 0.8 (Figure S1A); post-operative IRV - 1.4 (Figure S1B).

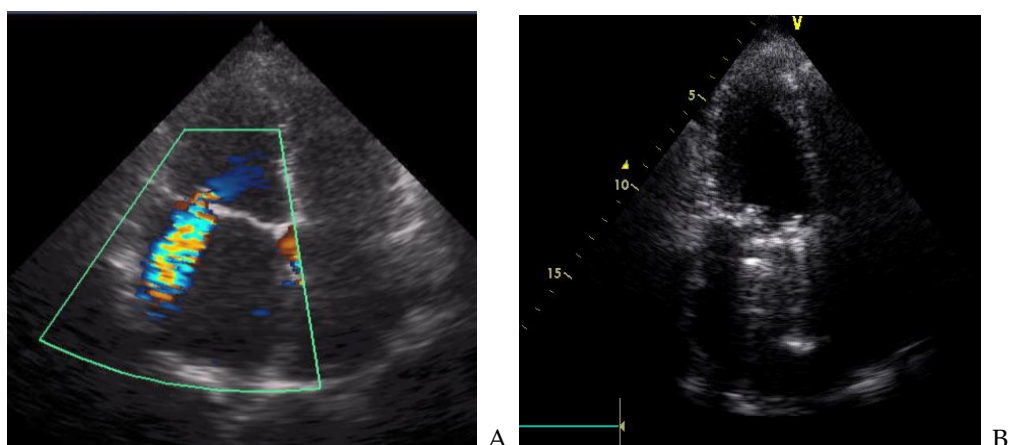

**Figure S2.** Type II remodeling (moderate) - moderately favorable prognosis (IRV 0.8-0.5). Patient with mitral valve stenosis and 2d degree regurgitation: pre-operative IRV - 0.6 (Figure S2A); post-operative IRV - 0.9 (Figure S2B).

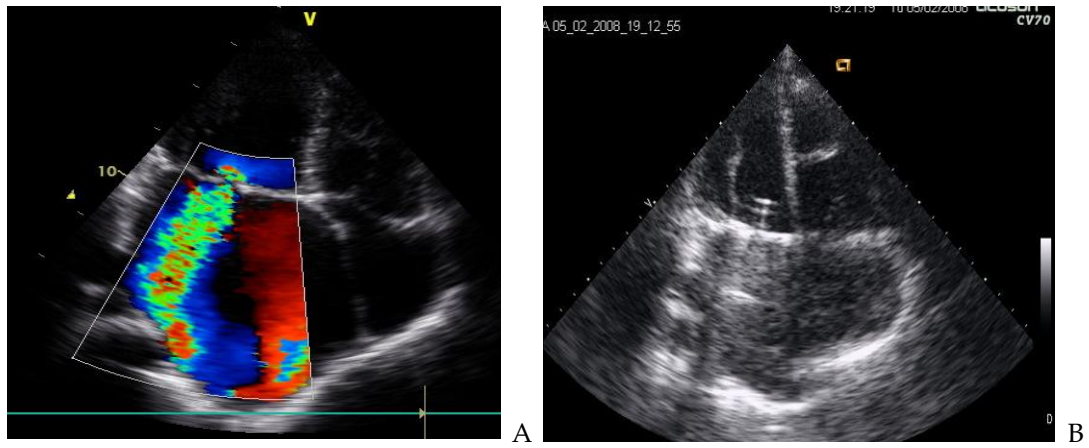

**Figure S3.** Type III remodeling (severe) - poor prognosis ( $IRV < 0.5$ ). Patient with mitral valve stenosis and 3d regurgitation: pre-operative  $IRV = 0.3$  (Figure S3A); post-operative  $IRV = 0.5$  (Figure S3B).
